# Supplementary material
Source: publisher figshare collection journal article supplement (https://acs.figshare.com/ndownloader/files/5203774)
Supplement: Supplementary file 1 [file 5203774]

Supporting Information for:

# Insights into the Li Diffusion Dynamics and Nanostructuring of $\text{H}_2\text{Ti}_{12}\text{O}_{25}$ to Enhance Its Li Storage Performance

*Soomin Park,<sup>†,§</sup> Young Geun Yoo,<sup>†,§</sup> Inho Nam,<sup>†</sup> Seongjun Bae,<sup>†</sup> Jongseok Park,<sup>†</sup> Jeong Woo Han,<sup>‡</sup> and Jongheop Yi<sup>\*,†</sup>*

<sup>†</sup>World Class University (WCU) Program of Chemical Convergence for Energy & Environment, School of Chemical and Biological Engineering, Institute of Chemical Processes, Seoul National University, Seoul 151-742, Republic of Korea.

<sup>‡</sup>Department of Chemical Engineering, University of Seoul, Seoul 130-743, Republic of Korea.

<sup>§</sup>These authors (S. Park and Y. G. Yoo) contributed equally to this work.

\*Address correspondence to [jyi@snu.ac.kr](mailto:jyi@snu.ac.kr).

## Supporting Figures and Tables

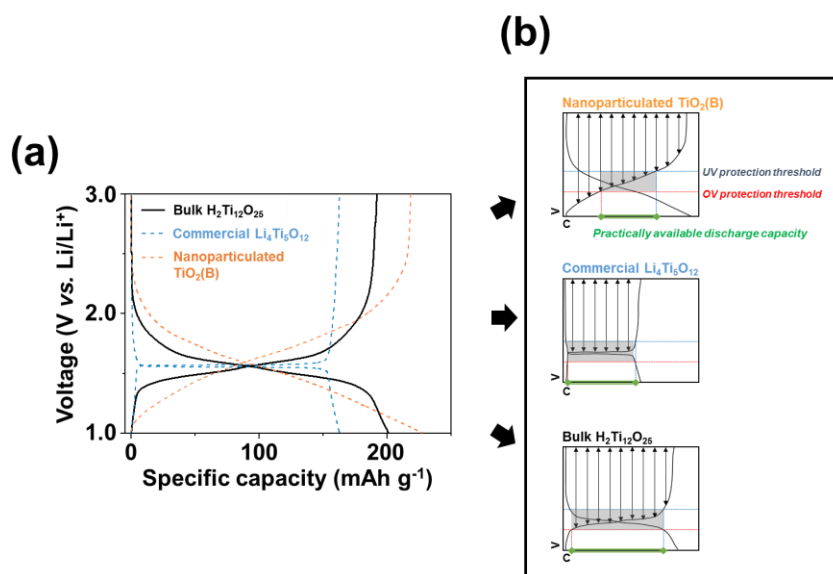

**Figure S1.** (a) Typical charge/discharge voltage profiles for HTO, Li<sub>4</sub>Ti<sub>5</sub>O<sub>12</sub>, and TiO<sub>2</sub>(B) obtained at 10 mA g<sup>-1</sup>. The commercially available LTO sample was purchased from Posco ESM Co. Ltd. The nanoparticulated TiO<sub>2</sub>(B) was synthesized according to a previous report.<sup>9</sup> Briefly, a sample of titanium foil was dissolved in an aqueous solution of H<sub>2</sub>O<sub>2</sub> and NH<sub>3</sub>, and the resultant solution was then mixed with glycolic acid. The products (a yellow gel) were sealed in a Teflon-lined stainless steel autoclave and heated at 160 °C for 30 min. After washing and drying, nanoparticulated TiO<sub>2</sub>(B) powders were obtained. (b) Schematic illustrations comparing the voltage profiles of 3 types of titanate-based anode materials. Practically available discharge capacity, under-voltage/over-voltage protection thresholds are denoted.

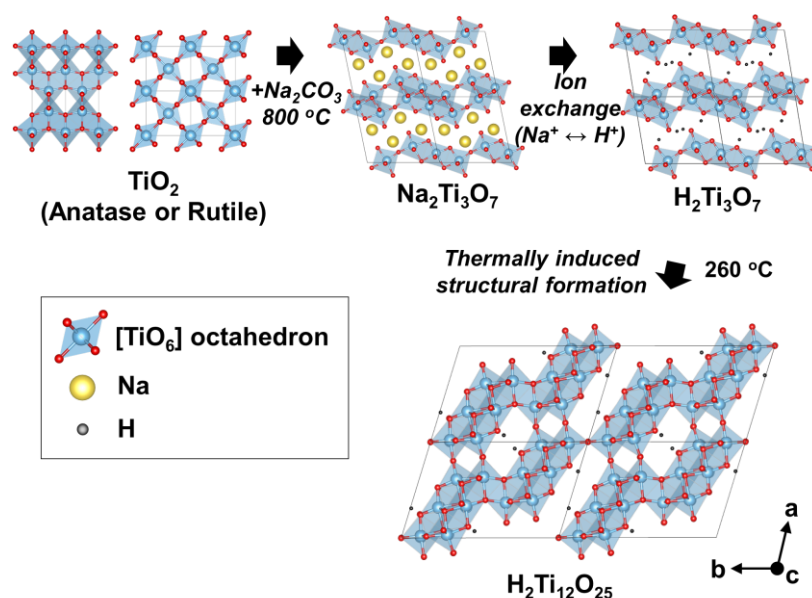

**Figure S2.** Synthesis of HTO crystals via a sequential process involving the recrystallization of  $\text{TiO}_2$ , ion exchange, and thermally induced dehydration/structural formation. Hexahedrons represent the boundary of a primitive unit cell. For the synthesis of HTO,  $\text{Na}_2\text{Ti}_3\text{O}_7$  as a parent crystal was first prepared *via* a solid state reaction between  $\text{TiO}_2$  and  $\text{Na}_2\text{CO}_3$  at  $800^\circ\text{C}$ .<sup>12</sup> The crystal structure of the starting  $\text{TiO}_2$  is highly important and determines the shape and size of the final HTO products. In this study, we utilized three types of  $\text{TiO}_2$  with different crystalline structures: pure anatase or rutile and an anatase/rutile-mixed phase. The produced  $\text{Na}_2\text{Ti}_3\text{O}_7$  crystals can be efficiently converted to  $\text{H}_2\text{Ti}_3\text{O}_7$  *via* an ion exchange step between  $\text{Na}^+$  and  $\text{H}^+$ .<sup>S2,S3</sup>  $\text{H}_2\text{Ti}_3\text{O}_7$  with a layered structure is rearranged to form final HTO crystals during thermally induced dehydration and condensation reactions.<sup>11</sup>

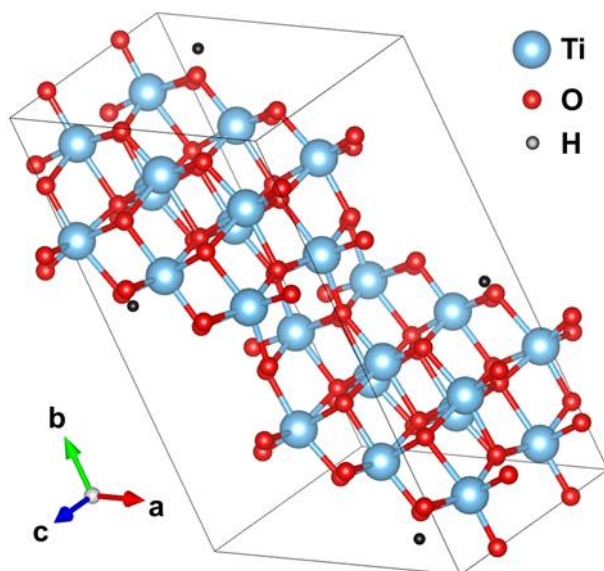

**Figure S3.** DFT-optimized crystal structure of  $\text{H}_4\text{Ti}_{24}\text{O}_{50}$ . Hexahedron represents the boundary of a primitive unit cell. The coordinates of this structure are presented below.

### Coordinates of $\text{H}_4\text{Ti}_{24}\text{O}_{50}$

Unit cell (Å)

|  | X                   | Y                   | Z                   |
|--|---------------------|---------------------|---------------------|
|  | 9.4775307667714586  | -0.0907339953220821 | -0.0050687142392930 |
|  | -4.2311319016390598 | 14.2742692283106809 | 0.0013427561070414  |
|  | -0.0055735329651447 | -0.0025817149010813 | 7.7947458599171524  |

| Atom | Cartesian coordinates |             |             |
|------|-----------------------|-------------|-------------|
|      | X                     | Y           | Z           |
| Ti   | 8.752673452           | 1.714004186 | 2.000160169 |
| Ti   | 8.841069336           | 1.731665574 | 5.839629612 |
| Ti   | 5.703452977           | 2.505454062 | 1.976972628 |

|       |              |              |             |
|-------|--------------|--------------|-------------|
| Ti    | 5.653498070  | 2.604665863  | 5.861759004 |
| Ti    | 2.661355185  | 3.380330433  | 1.991120013 |
| Ti    | 2.668621196  | 3.440557588  | 5.846370179 |
| Ti    | -3.740363928 | 12.498154468 | 1.955294140 |
| Ti    | -3.651969067 | 12.515813523 | 5.794763583 |
| Ti    | -0.552792659 | 11.625155345 | 1.933165329 |
| Ti    | -0.602748676 | 11.724362481 | 5.817952286 |
| Ti    | 2.432084190  | 10.789262771 | 1.948556825 |
| Ti    | 2.439350047  | 10.849486744 | 5.803807223 |
| Ti    | 1.694422487  | 5.743501735  | 0.024538634 |
| Ti    | 1.717368407  | 5.750441766  | 3.903423059 |
| Ti    | -2.810521754 | 10.203449579 | 7.768334101 |
| Ti    | -2.761153530 | 10.096517617 | 3.872819175 |
| Ti    | 0.333999673  | 9.275942536  | 7.743668866 |
| Ti    | 0.209213706  | 9.209569344  | 3.889083325 |
| Ti    | 3.406282158  | 8.486317351  | 7.770389537 |
| Ti    | 3.383337086  | 8.479377320  | 3.891504410 |
| Ti    | 7.911226639  | 4.026369084  | 0.026591183 |
| Ti    | 7.861858379  | 4.133301046  | 3.922106436 |
| Ti    | 4.766705103  | 4.953876126  | 0.051258302 |
| Ti    | 4.891491223  | 5.020249743  | 3.905843679 |
| <hr/> |              |              |             |
| O     | 1.065944218  | 2.563339218  | 1.975780670 |
| O     | 1.088258824  | 2.573800359  | 5.875949133 |
| O     | 1.907503893  | 5.366039214  | 1.955630053 |
| O     | 1.926416217  | 5.369771544  | 5.876095950 |

|   |              |              |             |
|---|--------------|--------------|-------------|
| O | 3.912773290  | 1.900855395  | 1.957109373 |
| O | 3.947410593  | 1.964857175  | 5.880897234 |
| O | 4.695406096  | 4.506336384  | 1.962374105 |
| O | 4.717035740  | 4.513028480  | 5.884227096 |
| O | 6.865588285  | 1.108993522  | 1.958591480 |
| O | 6.812322697  | 1.028093263  | 5.889224445 |
| O | 7.640722477  | 3.655012062  | 1.969925882 |
| O | 7.611263131  | 3.608266332  | 5.876672532 |
| O | 4.012447011  | 11.656018092 | 1.918974619 |
| O | 4.034759325  | 11.666480718 | 5.819143082 |
| O | 3.174287322  | 8.860048391  | 1.918830589 |
| O | 3.193202427  | 8.863779024  | 5.839296486 |
| O | 1.153295055  | 12.264962336 | 1.914028493 |
| O | 1.187930858  | 12.328963480 | 5.837816238 |
| O | 0.383669538  | 9.716793151  | 1.910699676 |
| O | 0.405297790  | 9.723480582  | 5.832552667 |
| O | -1.711617107 | 13.201726462 | 1.905695474 |
| O | -1.764883804 | 13.120824295 | 5.836328555 |
| O | -2.510557074 | 10.621555300 | 1.918252614 |
| O | -2.540018400 | 10.574804056 | 5.824999496 |
| O | -3.549215455 | 12.005780462 | 7.777852573 |
| O | -3.509141814 | 12.000482831 | 3.863479345 |
| O | -1.514058236 | 8.498892538  | 7.723199991 |
| O | -1.505771100 | 8.585676477  | 3.891174769 |
| O | -0.095633397 | 5.146202727  | 0.005352714 |

|   |              |              |             |
|---|--------------|--------------|-------------|
| O | -0.059273892 | 5.118564480  | 3.939219430 |
| O | -0.762237266 | 11.047450097 | 7.776323076 |
| O | -0.728675951 | 11.101931217 | 3.870522605 |
| O | 1.368148494  | 7.674915236  | 7.768184961 |
| O | 1.387966377  | 7.671697331  | 3.888465161 |
| O | 2.922765592  | 3.981580208  | 0.022602623 |
| O | 2.899697570  | 3.975760859  | 3.919272777 |
| O | 8.649920101  | 2.224038837  | 0.017072195 |
| O | 8.609846410  | 2.229336256  | 3.931446034 |
| O | 6.614762877  | 5.730926547  | 0.071731042 |
| O | 6.606476250  | 5.644143033  | 3.903754326 |
| O | 5.196337631  | 9.083616783  | 7.789574228 |
| O | 5.159978696  | 9.111255032  | 3.855703161 |
| O | 5.862942348  | 3.182369414  | 0.018602834 |
| O | 5.829381164  | 3.127887869  | 3.924403005 |
| O | 3.732556279  | 6.554903425  | 0.026744973 |
| O | 3.712739398  | 6.558121755  | 3.906463005 |
| O | 2.177939054  | 10.248238878 | 7.772324639 |
| O | 2.201007640  | 10.254058227 | 3.875655156 |
| O | -4.350533925 | 14.229413787 | 1.988443857 |
| O | 9.451239303  | 0.000405010  | 5.806481056 |
| H | 6.840400855  | 6.434844015  | 0.711136052 |
| H | -1.739694960 | 7.794974223  | 7.083790661 |
| H | -1.422022179 | 14.141795579 | 1.911731227 |
| H | 6.522727061  | 0.088023748  | 5.883176148 |

---

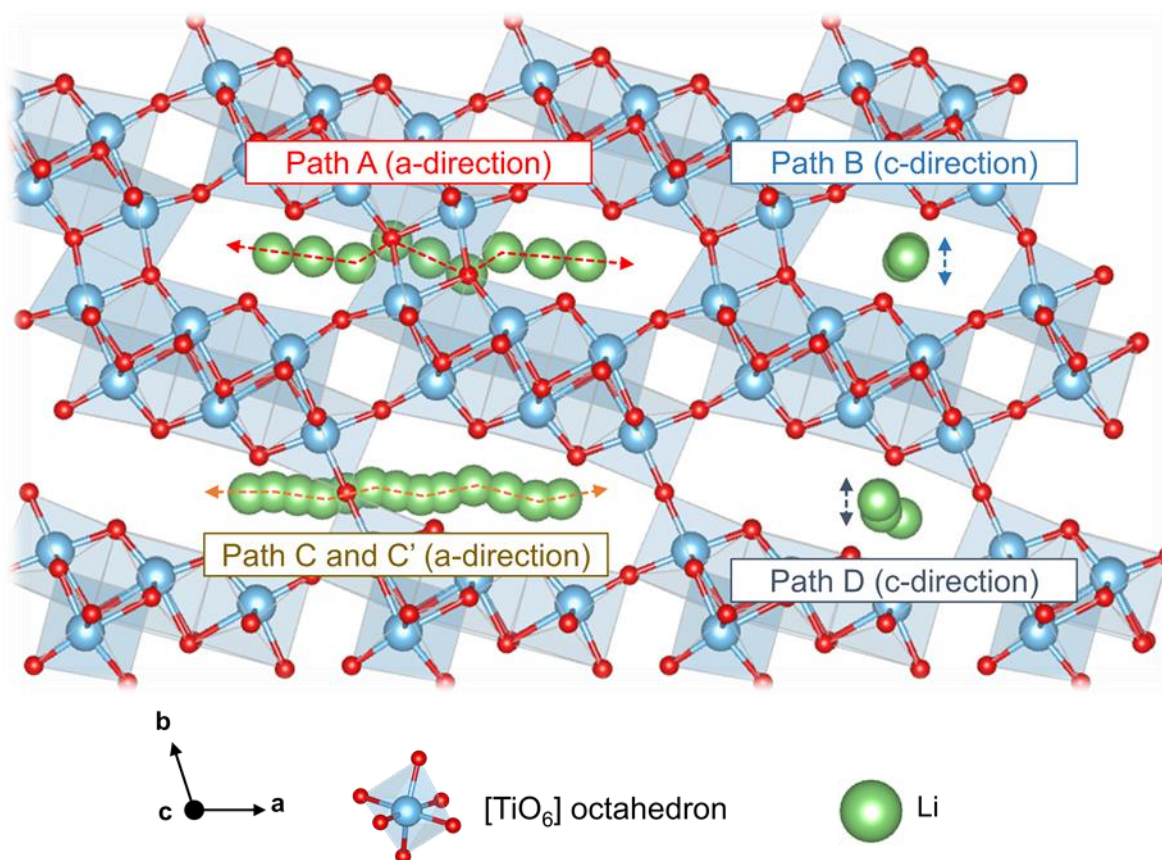

**Figure S4.** Atomic crystal structure of Li-incorporated  $\text{Ti}_{12}\text{O}_{25}$  and possible pathways for Li migration inside the crystal. The paths A and C represent Li migrations in the a-direction, and the paths B and C correspond to the movements of Li in the c-direction.



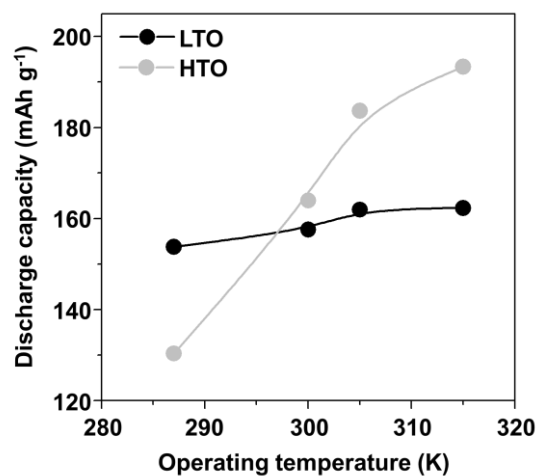

**Figure S5.** Discharge capacities at various operating temperatures: Comparison between HTO (Li diffusion-controlled process) and  $\text{Li}_4\text{Ti}_5\text{O}_{12}$  (electron conduction-controlled process). It is well known that the electrochemical performance of spinel LTO is mainly limited by its intrinsically low electronic conductivity.<sup>S4</sup>

**Table S1** Diffusion characteristics of Li inside the HTO crystal.

|         |                              | Migration<br>distance<br>( $d$ ) | Energy<br>barrier<br>( $E_{act}$ ) | Diffusivity at 305K <sup>a)</sup><br>(D) |
|---------|------------------------------|----------------------------------|------------------------------------|------------------------------------------|
|         |                              | Å                                | eV                                 | cm <sup>2</sup> s <sup>-1</sup>          |
| Path A  | a-direction                  | 9.34                             | 1.05                               | $3.82 \times 10^{-19}$                   |
| Path B  | c-direction                  | 2.92                             | 0.157                              | $2.16 \times 10^{-5}$                    |
| Path C  | a-direction                  | 5.82                             | 0.740                              | $2.04 \times 10^{-14}$                   |
| Path C' | a-direction<br>(inside pore) | 3.68                             | 0.637                              | $4.05 \times 10^{-13}$                   |
| Path D  | c-direction                  | 3.98                             | 0.271                              | $5.22 \times 10^{-7}$                    |

*Note.* In DFT calculations, a  $\text{Li}_{0.5}\text{Ti}_{12}\text{O}_{25}$  crystal model was used to evaluate the energy barrier.

<sup>a)</sup>Diffusivity was calculated using the Einstein-Smoluchowski relation:  $D = g\Gamma d^2$

where  $g(\cong 1)$  is a geometric factor,  $\Gamma(= \nu^* \exp(-E_{act}/k_B T))$  is a hopping frequency between sites ( $\nu^* \cong 10^{13}$ ) and  $d$  is the migration distance.

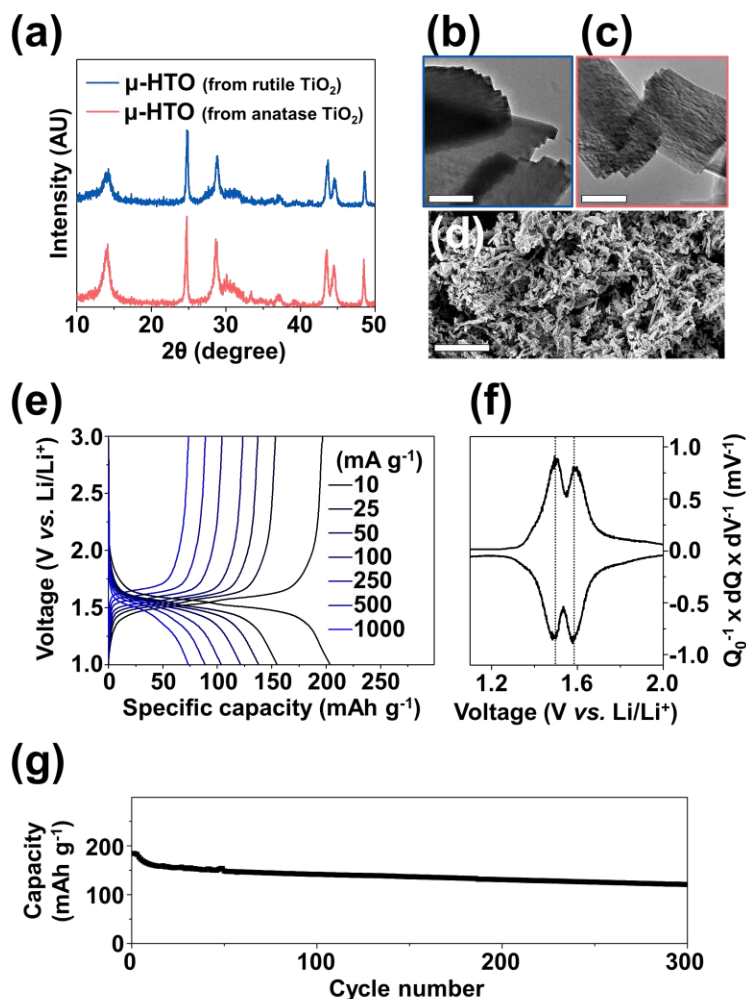

**Figure S6.** XRD patterns (a) and TEM images of the prepared  $\mu$ -HTO crystals synthesized using pure rutile (b) and anatase (c)  $\text{TiO}_2$  as starting materials. Scale bars correspond to 0.2  $\mu\text{m}$ . (d) SEM image of a synthesized  $\mu$ -HTO crystal. Scale bar corresponds to 10  $\mu\text{m}$ . (e) Galvanostatic charge/discharge voltage profiles of  $\mu$ -HTO made from rutile  $\text{TiO}_2$  at various current densities from 10  $\text{mA g}^{-1}$  to 1,000  $\text{mA g}^{-1}$ . (f) Corresponding differential capacities obtained at 10  $\text{mA g}^{-1}$ . The profiles clearly show the potential region of the phase transition (at 1.50 V and 1.58 V) during the Li intercalation/deintercalation process, indicative of a two-phase mechanism of lithiation. (g) Discharge capacities of the  $\mu$ -HTO at 25  $\text{mA g}^{-1}$  during the galvanostatic charge/discharge cycles.

## Detailed description of the electrochemical performance of $\mu$ -HTO

Figure S6 shows characterization and electrochemical data for two kinds of  $\mu$ -HTO materials synthesized from pure anatase or rutile  $\text{TiO}_2$ . X-ray diffraction (XRD) patterns of both  $\mu$ -HTO crystals are in agreement with the previously reported pattern (Figure S6a), which indicates that the HTO particles with a high crystallinity were successfully synthesized.<sup>12,13</sup> Transmission electron microscopy (TEM) images and the scanning electron microscopy (SEM) image in Figure S6b-d reveal that both  $\mu$ -HTO particles are identical rod-shaped and micrometer-sized particles having transversal lengths of about 0.4  $\mu\text{m}$  and longitudinal lengths of 1~10  $\mu\text{m}$ .

Galvanostatic charge/discharge measurements of the  $\mu$ -HTO were performed between 1.0 and 3.0 V (vs.  $\text{Li/Li}^+$ ) at various rates from 10  $\text{mA g}^{-1}$  to 1,000  $\text{mA g}^{-1}$ . The electrode composed of  $\mu$ -HTO was stably charged and discharged with 95~99% Coulombic efficiency, and apparent voltage plateaus were consistently observed (Figure S6e). The electrode delivered reversible capacities of 192, 154, 137, 124, 104, 89, and 74  $\text{mAh g}^{-1}$  at current densities of 10, 25, 50, 100, 250, 500, and 1,000  $\text{mA g}^{-1}$ , respectively. In corresponding differential capacities (Figure S6f), there are two voltage plateau regions centered at 1.50 V and 1.58 V (vs.  $\text{Li/Li}^+$ ). The two separated voltage plateaus suggest two types of Li insertion sites and a subsequent phase transformation.<sup>S1</sup> The  $\mu$ -HTO showed a capacity retention of 66% during 300 charge/discharge measurements. The predictable reason for the capacity fading during the repetitive cycles is that irreversibly inserted Li obstructs further lithiation at confined areas of bulky  $\mu$ -HTO crystals.

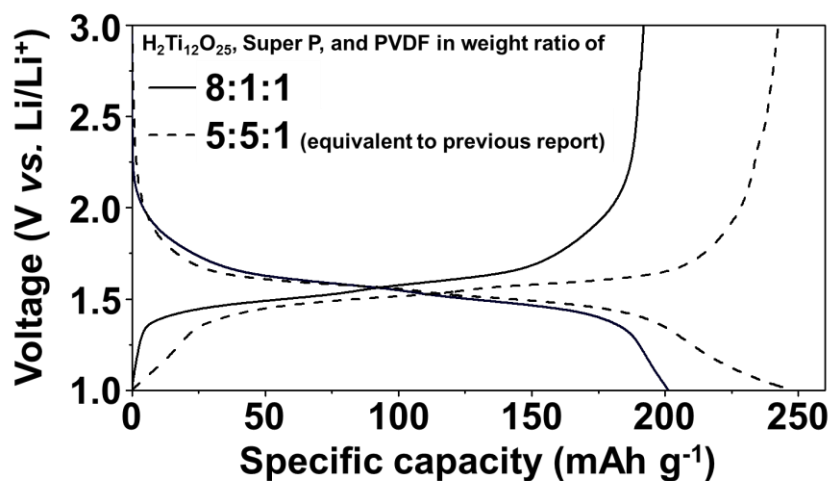

**Figure S7.** Galvanostatic charge/discharge voltage profiles (obtained at 10 mA g<sup>-1</sup>) of HTO electrodes with different weight ratios of  $\mu$ -HTO/conductive carbon (Super P)/binder. In the case of a 5:5:1 ratio, the electrode delivers a discharge capacity of more than 240 mAh g<sup>-1</sup>, which is in good agreement with the results of previous research.<sup>13</sup> The inordinately high content of the conductive carbon additive significantly reduces the volumetric energy density and cost-effectiveness of the electrode. Therefore, from a practical perspective, we selected a weight ratio of 8:1:1 (HTO:Super P:PVDF) for the electrochemical evaluations of the as-prepared HTO electrodes.

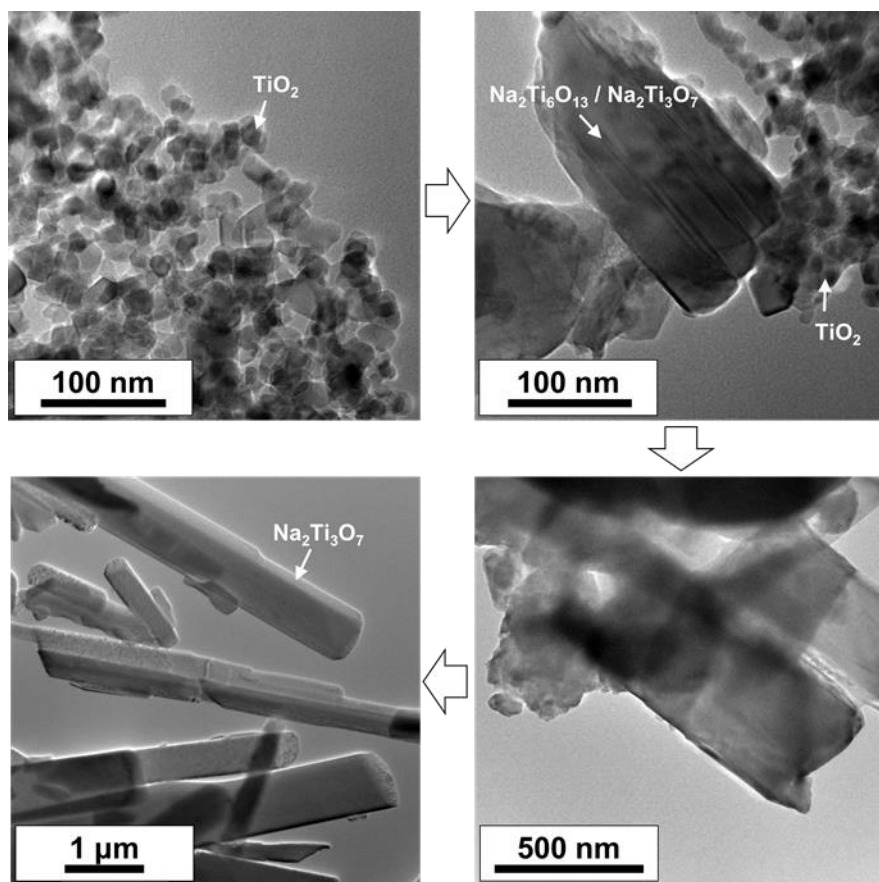

**Figure S8.** TEM images of samples obtained during the following conversion reaction:  
 $\text{TiO}_2 + \text{Na}_2\text{CO}_3 \rightarrow \text{Na}_2\text{Ti}_3\text{O}_7$ .

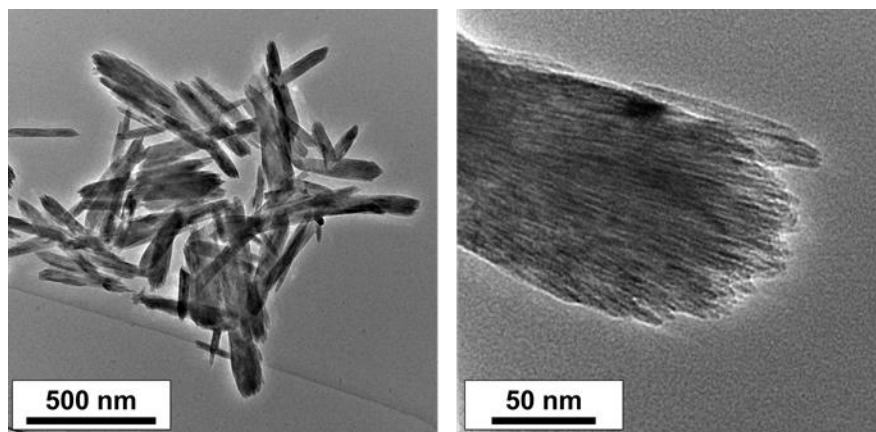

**Figure S9.** TEM images of nanostructured  $\text{H}_2\text{Ti}_3\text{O}_7$  with the shape of a nano-bundle before thermally induced dehydration and condensation reactions at 260 °C.

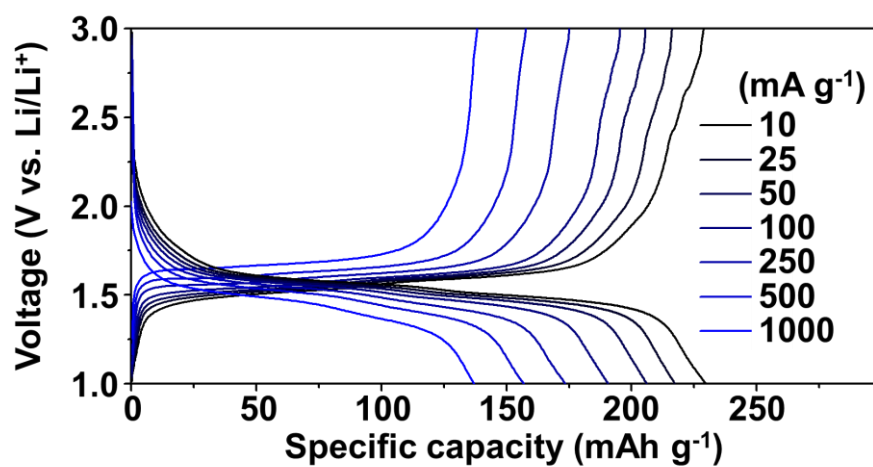

**Figure S10.** Galvanostatic charge/discharge voltage profiles of n-HTO at various current densities ranging from 10 to 1,000 mA g<sup>-1</sup>.



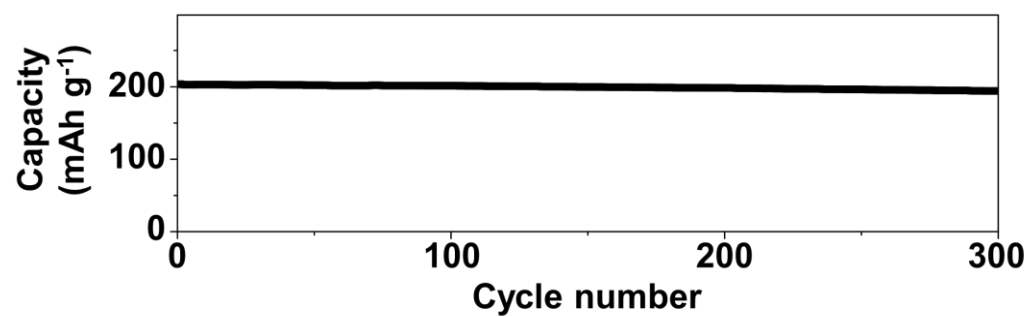

**Figure S11.** Discharge capacities of n-HTO at 25 mA g<sup>-1</sup> during the galvanostatic charge/discharge cycles.

## REFERENCES

- S1 Paoella, A.; Bertoni, G.; Dilella, E.; Marras, S.; Ansaldo, A.; Manna, L.; George, C. Redox Centers Evolution in Phospho-Olivine Type ( $\text{LiFe}_{0.5}\text{Mn}_{0.5}\text{PO}_4$ ) Nanoplatelets with Uniform Cation Distribution. *Nano Lett.* **2014**, *14*, 1477-1483.
- S2 Kikkawa, S.; Yasuda, F.; Koizumi, M. Ionic Conductivities of  $\text{Na}_2\text{Ti}_3\text{O}_7$ ,  $\text{K}_2\text{Ti}_4\text{O}_9$  and Their Related Materials. *Mat. Res. Bull.* **1985**, *20*, 1221-1227.
- S3 Izawa, H.; Kikkawa, S.; Koizumi, M. Ion Exchange and Dehydration of Layered Titanates,  $\text{Na}_2\text{Ti}_3\text{O}_7$  and  $\text{K}_2\text{Ti}_4\text{O}_9$ . *J. Phys. Chem.* **1982**, *86*, 5023-5026.
- S4 Zhang, Q.; Li, X. Recent Developments in the Doped- $\text{Li}_4\text{Ti}_5\text{O}_{12}$  Anode Materials of Lithium-Ion Batteries for Improving the Rate Capability. *Int. J. Electrochem. Sci.* **2013**, *8*, 6449-6456.
